# Supplementary material for: Competition between N and O: use of diazine N-oxides as a test case for the Marcus theory rationale for ambident reactivity
Source: Chem Sci. 2020 Jul 23;11(35):9630–47. doi: 10.1039/d0sc02834g (PMC8162281; doi:10.1039/d0sc02834g)
Supplement: SC-011-D0SC02834G-s050 [file SC-011-D0SC02834G-s050.docx]

Compound **17b** - from quinoxaline *N*-oxide + MeOTf – reaction in CD3CN, then solvent swapped to DMSO-*d*6. See Supporting Information, pg. S21 – S23.

**NMR Spectra in CD3CN**

NMR Spectrometer: Bruker Avance I 400

Acquisition Software: Bruker Topspin version 2.1

Programs used to process software: MestreNova (1H, HSQC, HMBC, COSY NMR)

Topspin (13C{1H} NMR)

Reference Frequency for 1H NMR: 400 MHz

Reference Frequency for 13C NMR: 100 MHz

**NMR Spectra in DMSO-*d*6**

NMR Spectrometer: Bruker Avance III 600

Acquisition Software: Bruker Topspin version 3.5.7

Program used to process software: MestreNova

Reference Frequency for 1H NMR: 600 MHz

Reference Frequency for 15N NMR: 60.8 MHz

Unprocessed NMR spectra from the above reaction are provided in JCAMP-DX format. Since saving in this format does not allow preservation of correct integration curves (1D NMR spectra) or insertion of spectral traces (2D spectra), the spectra are provided in their original, unprocessed state, with the exception of application of t1 noise reduction to 1H-15N HMBC NMR spectra.
