# Supplementary material for: Competition between N and O: use of diazine N-oxides as a test case for the Marcus theory rationale for ambident reactivity
Source: Chem Sci. 2020 Jul 23;11(35):9630–47. doi: 10.1039/d0sc02834g (PMC8162281; doi:10.1039/d0sc02834g)
Supplement: SC-011-D0SC02834G-s060 [file SC-011-D0SC02834G-s060.docx]

Compound **18** - from Quinoxaline *N*-oxide + 4-methylbenzhydryl chloride + AgOTf in CD2Cl2. See Supporting Information, pg. S26 – S27.

NMR Spectrometer: Bruker Avance III 600

Acquisition Software: Bruker Topspin version 3.5.7

Program used to process software: MestreNova

Reference Frequency for 1H NMR: 600 MHz

Reference Frequency for 15N NMR: 60.8 MHz

Reference Frequency for 13C NMR: 150 MHz

**Note**: The 1H NMR spectrum produced upon opening the raw NMR files is mis-referenced – it is necessary to re-reference the CHDCl2 signal to 5.32 ppm.

Unprocessed NMR spectra from the above reaction are provided in JCAMP-DX format. Since saving in this format does not allow preservation of correct integration curves (1D NMR spectra) or insertion of spectral traces (2D spectra), the spectra are provided in their original, unprocessed state, with the exception of application of t1 noise reduction to 1H-15N HMBC NMR spectra.
